# Supplementary material for: Exposure to Brucella Species, Coxiella burnetii, and Trichinella Species in Recently Imported Camels from Sudan to Egypt: Possible Threats to Animal and Human Health
Source: MDPI journal article supplement (doi:10.3390/pathogens13020179), 2024-02-16
Supplement: s1 [file s1]

**Table S1.** Seroprevalence of *Brucella* species, *Coxiella burnetti*, and *Trichinella* species in camels using various serological tests.

| Type of test             | No. of tested | No. of Negative<br>(%) | No. of positive<br>(%) | 95% CI*  |
|--------------------------|---------------|------------------------|------------------------|----------|
| RBT                      | 491           | 465 (94.7)             | 26 (5.3)               | 3.6-7.8  |
| BAPAT                    | 491           | 465 (94.7)             | 26 (5.3)               | 3.6-7.8  |
| Bruc. ELISA              | 491           | 474 (96.5)             | 17 (3.5)               | 2.1-5.6  |
| RBT+BAPAT                | 491           | 465 (94.7)             | 26 (5.3)               | 3.6-7.8  |
| RBT+Bruc. ELISA          | 491           | 475 (96.7)             | 16 (3.3)               | 1.9-5.4  |
| BAPAT+Bruc. ELISA        | 491           | 475 (96.7)             | 16 (3.3)               | 1.9-5.4  |
| Cox. ELISA               | 491           | 470 (95.7%)            | 21 (4.3)               | 2.7-6.6  |
| Bruc. ELISA+Cox. ELISA   | 491           | 486 (99%)              | 5 (1)                  | 0.4-2.5  |
| Trich. ELISA             | 491           | 479 (97.6)             | 12 (2.4)               | 1.3-4.4  |
| Bruc. ELISA+Trich. ELISA | 491           | 490 (99.8)             | 1 (0.2)                | 0.01-1.3 |
| Cox. ELISA+Trich. ELISA  | 491           | 489 (99.6)             | 2 (0.4)                | 0.07-1.6 |

\* 95% CI calculated according to method described by (<http://vassarstats.net/>).

**Table S2.** Factors influencing the estimated seroprevalence of *Brucella* species in camels.

| Analyzed factor          | No. of tested | No. of negative (%) | No. of positive (%) | OR (95% CI)*    | <i>p</i> -value* |
|--------------------------|---------------|---------------------|---------------------|-----------------|------------------|
| <b>Collection region</b> |               |                     |                     |                 |                  |
| Shalateen (Red Sea)      | 391           | 374 (95.7)          | 17 (4.3)            | 9.4 (0.6-157.6) | 0.030            |
| Abu Simbel (Aswan)       | 100           | 100 (100)           | 0                   | Ref             | Ref              |
| <b>Collection time</b>   |               |                     |                     |                 |                  |
| Nov 2015-Dec 2015        | 100           | 94 (94)             | 6 (6)               | 13.8 (0.8-249)  | 0.029            |
| Feb 2016-Mar 2016        | 291           | 280 (96.2)          | 11 (3.8)            | 8.2 (0.5-141.2) | 0.073            |
| Sep 2018-Mar 2021        | 100           | 100 (100)           | 0                   | Ref             | Ref              |

\* Odds ratio at 95% confidence interval and *p*-value were calculated by GraphPad Prism version 5. The result is significant at  $p < 0.05$  as calculated by Fisher's exact test. Ref.; value used as a reference.

**Table S3.** Factors influencing the estimated seroprevalence of *Coxiella burnetii* in camels.

| Analyzed factor          | No. of tested | No. of negative (%) | No. of positive (%) | OR (95% CI)*   | <i>p</i> -value* |
|--------------------------|---------------|---------------------|---------------------|----------------|------------------|
| <b>Collection region</b> |               |                     |                     |                |                  |
| Shalateen (Red Sea)      | 391           | 373 (95.4)          | 18 (4.6)            | 1.6 (0.5-5.4)  | 0.590            |
| Abu Simbel (Aswan)       | 100           | 97 (97)             | 3 (3)               | Ref            | Ref              |
| <b>Collection time</b>   |               |                     |                     |                |                  |
| Nov 2015-Dec 2015        | 100           | 87 (87)             | 13 (13)             | 4.8 (1.3-17.5) | 0.016            |
| Feb 2016-Mar 2016        | 291           | 286 (98.3)          | 5 (1.7)             | 0.6 (0.1-2.4)  | 0.427            |
| Sep 2018-Mar 2021        | 100           | 97 (97)             | 3 (3)               | Ref            | Ref              |

\* Odds ratio at 95% confidence interval and *p*-value were calculated by GraphPad Prism version 5. The result is significant at  $p < 0.05$  as calculated by Fisher's exact test. Ref.; value used as a reference.

**Table S4.** Factors influencing the estimated seroprevalence of *Trichinella* species in camels.

| Analyzed factor          | No. of tested | No. of negative (%) | No. of positive (%) | OR (95% CI)*    | <i>p</i> -value* |
|--------------------------|---------------|---------------------|---------------------|-----------------|------------------|
| <b>Collection region</b> |               |                     |                     |                 |                  |
| Shalateen (Red Sea)      | 391           | 373 (97.7)          | 9 (2.3)             | 0.8 (0.2-2.9)   | 0.719            |
| Abu Simbel (Aswan)       | 100           | 97 (97)             | 3 (3)               | Ref             | Ref              |
| <b>Collection time</b>   |               |                     |                     |                 |                  |
| Nov 2015-Dec 2015        | 100           | 93 (93)             | 7 (7)               | 10.9 (2.2-53.3) | 0.001            |
| Feb 2016-Mar 2016        | 291           | 289 (99.3)          | 2 (0.7)             | Ref             | Ref              |
| Sep 2018-Mar 2021        | 100           | 97 (97)             | 3 (3)               | 4.5 (0.7-27.2)  | 0.108            |

\* Odds ratio at 95% confidence interval and *p*-value were calculated by GraphPad Prism version 5. The result is significant at  $p < 0.05$  as calculated by Fisher's exact test. Ref.; value used as a reference.
